# Supplementary material
Source: publisher figshare collection journal article supplement (https://sage.figshare.com/ndownloader/files/21813885)
Supplement: Supplementary file 1 [file 21813885]

id	avg_num_tics_baseline_sess1_screen	avg_num_tics_baseline_sess2_screen	avg_num_ticfree10s_baseline_sess1_screen	avg_num_ticfree10s_baseline_sess2_screen	avg_num_tics_verbal_sess1_screen	avg_num_tics_verbal_sess2_screen	avg_num_ticfree10s_verbal_sess1_screen	avg_num_ticfree10s_verbal_sess2_screen	supp_num_tics_verbal_sess1_screen	supp_num_ticfree10s_verbal_sess1_screen	avg_num_tics_DRZ_sess1_screen	avg_num_tics_DRZ_sess2_screen	avg_num_ticfree10s_DRZ_sess1_screen	avg_num_ticfree10s_DRZ_sess2_screen	supp_num_tics_DRZ_sess1_screen	supp_num_ticfree10s_DRZ_sess1_screen	avg_num_tics_NCR_sess1_screen	avg_num_tics_NCR_sess2_screen	avg_num_ticfree10s_NCR_sess1_screen	avg_num_ticfree10s_NCR_sess2_screen	supp_num_tics_NCR_sess1_screen	supp_num_ticfree10s_NCR_sess1_screen	avg_num_tics_baseline_screen	avg_num_ticfree10s_baseline_screen	avg_num_tics_verbal_screen	avg_num_ticfree10s_verbal_screen	supp_num_tics_verbal_avg_screen	avg_num_tics_DRZ_screen	avg_num_ticfree10s_DRZ_screen	supp_num_tics_DRZ_avg_screen	avg_num_tics_NCR_screen	avg_num_ticfree10s_NCR_screen	supp_num_tics_NCR_avg_screen	age_screen	sex_screen	days_since_onset_screen	ygtss_post_drz_total_tic_screen	ygtss_post_drz_total_tic_12mo	ygtss_post_drz_total_impairment_screen	ygtss_post_drz_total_impairment_12mo	dci_total_screen	dci_total_12mo	puts_total_completed_only_screen	puts_total_completed_only_12mo	expert_diagnosis_adhd_screen	expert_diagnosis_adhd_12mo	adhd_current_expert_total_screen	adhd_current_expert_total_12mo	expert_diagnosis_ocd_screen
NT701	4.983388704	0.8	4.38538206	5.8	3.4	0.797342193	5	5.581395348	0.317733333	-0.140151515	1.8	1.594684385	5.4	5.182724252	0.6388	-0.231363636	2.19269103	0.2	4.983388704	5.8	0.56	-0.136363636	2.895174709	5.091514143	2.096505824	5.291181364	0.275862069	1.697171381	5.291181364	0.413793103	1.198003328	5.391014975	0.586206897	7	F	25	13	6	20	0	35	37	18	25	Y	Y	22	34	N
NT703	4.8	NaN	4.2	NaN	5	NaN	4	NaN	-0.041666667	0.047619048	6.6	NaN	3.2	NaN	-0.375	0.238095238	4	NaN	4.4	NaN	0.166666667	-0.047619048	4.8	4.2	5	4	-0.041666667	6.6	3.2	-0.375	4	4.4	0.166666667	5	M	22	25	10	25	0	34	35	NaN	9	Y	Y	14	14	N
NT707	4	2.8	4.4	5	1.395348837	1.196013289	4.983388704	5.581395348	0.651162791	-0.132588342	3	2.2	4.6	5.2	0.25	-0.045454545	2.2	1.993355482	5	5.3820598	0.45	-0.136363636	3.4	4.7	1.295681063	5.282392026	0.618917334	2.6	4.9	0.235294118	2.096505824	5.191347754	0.38338064	7.2	F	110	14	8	5	0	22	23	9	NaN	Y	Y	8	10	N
NT712	7.2	0.996677741	3	5.581395348	5.43624161	5.182724252	3.624161074	3.986710963	0.244966443	-0.208053691	1.993355482	5.3820598	5.182724252	3.986710963	0.723145072	-0.727574751	4.983388704	3.986710963	3.787375415	4.584717608	0.30786268	-0.262458472	4.093178036	4.292845258	5.30884808	3.806343906	-0.296999063	3.687707641	4.584717608	0.099060044	4.485049834	4.186046511	-0.095737785	6.5	M	138	18	9	0	0	33	42	9	9	N	N	12	18	N
NT713	9.966777408	3.388704319	2.990033222	4.38538206	2.4	2.4	5	5	0.7592	-0.672222222	2.392026578	0.2	4.784053156	5.8	0.76	-0.6	0.6	3.588039867	5.8	4.38538206	0.9398	-0.939777778	6.677740863	3.687707641	2.4	5	0.640597015	1.297836938	5.291181364	0.805647304	2.096505824	5.091514143	0.686045645	6.8	M	182	7	7	0	0	33	49	15	14	Y	Y	30	28	N
NT714	0.8	8.2	5.6	2.4	1.8	3.4	5	4.4	-1.25	0.107142857	0.4	1	5.6	5.4	0.5	0	0.598006644	2.6	5.581395348	4.2	0.252491694	0.003322259	4.5	4	2.6	4.7	0.422222222	0.7	5.5	0.844444444	1.59733777	4.891846922	0.645036051	8.5	M	94	17	17	0	5	33	35	NaN	30	N	N	5	5	N
NT715	1.794019933	0.6	4.983388704	5.8	1.794019933	0.2	4.983388704	5.8	0	0	0.8	0	5.8	6	0.554074074	-0.163866667	0.2	0.4	5.8	5.6	0.888518519	-0.163866667	1.198003328	5.391014975	0.998336106	5.391014975	0.166666667	0.4	5.9	0.666111111	0.3	5.7	0.749583333	5.2	F	108	9	4	5	0	16	24	NaN	NaN	N	Y	14	21	Y
NT716	6.777408637	11	3.986710963	2.4	16.4	10.6	1	2	-1.419803922	0.749166667	8.8	16.5448505	3	2.19269103	-0.298431373	0.2475	21.4	15.7475083	0.4	0.797342193	-2.15754902	0.899666667	8.885191347	3.194675541	13.5	1.5	-0.519382023	12.67886855	2.595673877	-0.426966292	18.56905158	0.599001664	-1.08988764	5.1	M	101	7	18	0	10	15	33	9	9	Y	N	12	16	Y
NT718	2.8	9.76744186	4.6	2.990033222	6.6	7.8	3.8	2.8	-1.357142857	0.173913043	1.594684385	11.56146179	5.581395348	3.189368771	0.430469862	-0.213346815	14.4	26.8	2.4	0.6	-4.142857143	0.47826087	6.289517471	3.793677205	7.2	3.3	-0.144761905	6.578073089	4.38538206	-0.045878817	20.6	1.5	-2.275291005	6.8	M	50	17	22	10	0	38	50	NaN	18	N	N	0	15	N
NT719	6.976744186	4.4	3.388704319	4.2	4.584717608	5.4	3.787375415	3.2	0.342857143	-0.117647059	7.6	3	3.8	4.6	-0.089333333	-0.121372549	8.6	2.990033222	2.8	4.784053156	-0.232666667	0.17372549	5.690515807	3.793677205	4.991680532	3.494176373	0.122807018	5.3	4.2	0.068625731	5.790349417	3.793677205	-0.01754386	7.3	F	178	21	28	5	25	44	71	12	24	N	Y	22	40	N
NT720	2.6	1.4	4.6	5.2	2.591362126	1.993355482	4.38538206	4.983388704	0.003322259	0.046656074	3.388704319	2.392026578	4.186046511	4.784053156	-0.303347815	0.089989889	5.6	1.993355482	3.2	4.784053156	-1.153846154	0.304347826	2	4.9	2.292358804	4.684385382	-0.146179402	2.890365448	4.485049834	-0.445182724	3.793677205	3.993344426	-0.896838602	8.6	M	71	20	24	10	10	60	72	11	10	N	Y	15	22	Y
NT722	0.199335548	1.2	5.780730897	5.6	0.2	0.2	5.8	5.8	-0.003333333	-0.003333333	0.2	0.398671096	5.8	5.780730897	-0.003333333	-0.003333333	0	0	6	6	1	-0.037931035	0.698835275	5.690515807	0.2	5.8	0.713809524	0.299500832	5.790349417	0.571428571	0	6	1	12.9	M	76	7	5	0	0	16	16	9	9	Y	Y	22	20	N
NT724	0.797342193	NaN	5.581395348	NaN	0.199335548	NaN	5.980066445	NaN	0.75	-0.071428571	0	NaN	6	NaN	1	-0.075	1.4	NaN	5.4	NaN	-0.755833333	0.0325	0.797342193	5.581395348	0.199335548	5.980066445	0.75	0	6	1	1.4	5.4	-0.755833333	6.4	M	162	22	16	15	0	29	48	10	17	N	N	21	14	N
NT726	12	12.55813953	2	1.594684385	6.777408637	0.4	3.189368771	5.8	0.435215947	-0.594684385	0.199335548	1	5.780730897	5.6	0.983388704	-1.890365448	0.598006644	2.19269103	5.780730897	4.584717608	0.950166113	-1.890365448	12.27953411	1.797004992	3.594009983	4.492512479	0.707317073	0.599001664	5.690515807	0.951219512	1.395348837	5.182724252	0.886367933	8.1	F	95	32	21	25	5	29	53	9	17	Y	Y	27	39	N
NT728	1.8	1.2	5.2	5.2	1.395348837	2.6	5.182724252	4.4	0.224806202	0.003322259	1.4	1.6	5.6	5.2	0.222222222	-0.076923077	2	1	5	5.6	-0.111111111	0.038461538	1.5	5.2	1.996672213	4.792013311	-0.331114809	1.5	5.4	0	1.5	5.3	0	10.8	M	107	17	14	10	0	19	38	11	9	Y	Y	6	22	Y
NT729	4.584717608	0.8	4.38538206	5.6	0.598006644	1.6	5.3820598	5.2	0.869565217	-0.227272727	0.4	0.996677741	5.8	5.581395348	0.912753623	-0.322575758	0.6	1.594684385	5.8	5.182724252	0.869130435	-0.322575758	2.695507487	4.991680532	1.098169717	5.291181364	0.592592593	0.698835275	5.690515807	0.740740741	1.098169717	5.490848586	0.592592593	5.4	F	127	18	13	5	5	14	20	NaN	17	N	N	8	5	N
NT730	5.8	6.2	4.2	4.2	8.6	2.6	3.8	4.8	-0.482758621	0.095238095	0	1.8	6	5.6	1	-0.428571429	0.4	1.8	5.6	5.2	0.931034483	-0.333333333	6	4.2	5.6	4.3	0.066666667	0.9	5.8	0.85	1.1	5.4	0.816666667	7.8	M	118	12	14	0	0	20	47	13	16	N	N	9	8	N
NT731	1.6	1	5.4	5.6	0.2	1.2	5.8	5.2	0.875	-0.074074074	1.6	0.4	5	5.8	0	0.074074074	0.199335548	0.2	5.780730897	5.8	0.875415282	-0.070505722	1.3	5.5	0.7	5.5	0.461538462	1	5.4	0.230769231	0.199667221	5.790349417	0.84640983	10.5	M	167	16	18	5	10	34	39	9	23	N	N	9	3	N
NT732	3.2	2.591362126	4.8	4.784053156	0.8	2.19269103	5.6	4.784053156	0.75	-0.166666667	0.4	2.990033222	5.6	4.784053156	0.875	-0.166666667	0.398671096	2	5.780730897	5.2	0.875415282	-0.204318937	2.895174709	4.792013311	1.49750416	5.191347754	0.482758621	1.697171381	5.191347754	0.413793103	1.198003328	5.490848586	0.586206897	5.8	M	65	24	17	5	10	34	43	13	10	N	N	3	5	N
NT733	1.4	3.2	5.2	4.6	3.588039867	1	4.186046511	5.6	-1.562885619	0.194991056	2.6	1.4	4.6	5.2	-0.857142857	0.115384615	1.4	1.395348837	5	5.182724252	0	0.038461538	2.3	4.9	2.296173045	4.891846922	0.001663894	2	4.9	0.130434783	1.397670549	5.091514143	0.392317153	5.8	M	98	14	16	0	5	39	48	9	18	N	N	4	11	N
NT734	0	0.4	6	5.6	0	0.598006644	6	5.581395348	NaN	0	0	0.199335548	5.980066445	5.780730897	NaN	0.003322259	0.2	1.8	5.8	5.2	#NAME?	0.033333333	0.2	5.8	0.299500832	5.790349417	-0.49750416	0.099667774	5.880398671	0.50166113	1	5.5	-4	12.3	F	119	14	23	15	0	37	74	18	16	N	Y	13	26	N
NT735	6.2	2.591362126	3.4	4.784053156	1.196013289	0.398671096	5.182724252	5.780730897	0.807094631	-0.524330662	0	2.392026578	6	4.983388704	1	-0.764705882	0.2	9.169435215	5.8	2.790697674	0.967741935	-0.705882353	4.392678868	4.093178036	0.797342193	5.481727574	0.818483842	1.198003328	5.490848586	0.727272727	4.6921797	4.292845258	-0.068181818	6.1	F	28	18	19	0	0	28	40	15	15	N	N	4	0	N
NT736	0	0	5.980066445	5.980066445	0	0	6	6	NaN	-0.003333333	0	0	6	5.980066445	NaN	-0.003333333	0.2	0	5.8	5.980066445	#NAME?	0.030111111	0	5.980066445	0	6	NaN	0	5.990016639	NaN	0.099833611	5.890183028	#NAME?	8	M	119	30	22	30	10	80	79	9	9	Y	Y	35	25	N
NT738	7.774086378	6.8	3.388704319	3	8.8	2.591362126	3	4.584717608	-0.131965812	0.114705882	6.4	6.8	3.6	3.8	0.176752137	-0.062352941	4.6	3.8	4.2	4.6	0.408290598	-0.239411765	7.287853577	3.194675541	5.690515807	3.793677205	0.219178082	6.6	3.7	0.094383562	4.2	4.4	0.42369863	10.1	M	126	25	18	20	0	29	48	16	21	N	N	3	2	N
NT805	1	NaN	5.4	NaN	0.8	NaN	5.6	NaN	0.2	-0.037037037	0.199335548	NaN	5.780730897	NaN	0.800664452	-0.070505722	0	NaN	6	NaN	1	-0.111111111	1	5.4	0.8	5.6	0.2	0.199335548	5.780730897	0.800664452	0	6	1	6.6	F	79	19	6	10	0	32	34	9	13	Y	N	14	3	N
NT806	4.186046511	0.967741935	3.787375415	5.419354838	0.2	0.588235294	5.8	5.294117647	0.952222222	-0.531403509	0	0.4	6	5.8	1	-0.584210526	0.6	0	5.8	6	0.856666667	-0.531403509	2.553191489	4.615384615	0.396039604	5.544554455	0.844884488	0.2	5.9	0.921666667	0.3	5.9	0.8825	9.7	M	86	14	6	5	0	38	40	12	9	N	N	2	0	N
NT807	3.189368771	NaN	4.38538206	NaN	6.2	NaN	3.6	NaN	-0.943958333	0.179090909	0.398671096	NaN	5.780730897	NaN	0.875	-0.318181818	1.6	NaN	5.2	NaN	0.498333333	-0.185757576	3.189368771	4.38538206	6.2	3.6	-0.943958333	0.398671096	5.780730897	0.875	1.6	5.2	0.498333333	8.7	M	109	15	4	5	0	18	22	18	15	N	N	4	0	N
NT808	1	3.2	5.2	4.6	0.6	1.8	5.6	5.2	0.4	-0.076923077	0.797342193	0	5.581395348	6	0.202657807	-0.073345259	0.797342193	2	5.581395348	5.2	0.202657807	-0.073345259	2.1	4.9	1.2	5.4	0.428571429	0.399334443	5.790349417	0.809840742	1.397670549	5.391014975	0.334442596	10.7	F	30	8	6	0	10	18	13	17	9	N	N	5	5	N
NT809	6.8	3.6	3.4	4.6	3	6.4	4.8	4	0.558823529	-0.411764706	1.196013289	9.8	5.581395348	4.4	0.824115693	-0.641586867	2.392026578	4.6	4.784053156	4.2	0.648231386	-0.407074458	5.2	4	4.7	4.4	0.096153846	5.490848586	4.991680532	-0.05593242	3.494176373	4.492512479	0.328043005	7	M	59	25	7	10	0	19	36	9	15	Y	Y	19	25	N
NT810	4.6	10.6	4	2.6	6.4	8.4	3.2	3.6	-0.391304348	0.2	3	6.2	4.6	4	0.347826087	-0.15	2.790697674	4.38538206	4.784053156	3.986710963	0.393326593	-0.196013289	7.6	3.3	7.4	3.4	0.026315789	4.6	4.3	0.394736842	3.588039867	4.38538206	0.527889491	6.7	F	82	16	8	15	0	26	29	9	19	N	N	4	2	N
NT811	0.598006644	1.553398058	5.581395348	5.242718447	0	0.2	6	5.8	1	-0.075	0	0	6	5.980066445	1	-0.075	0.4	0.4	5.6	5.8	0.331111111	-0.003333333	1.081967213	5.409836065	0.1	5.9	0.907575758	0	5.990016639	1	0.4	5.7	0.63030303	10.2	M	158	12	18	15	10	30	37	9	13	N	N	17	6	N
NT812	0.996677741	0.4	5.3820598	5.6	0	0.6	5.980066445	5.6	1	-0.111111111	0.4	0.2	5.6	5.8	0.598666667	-0.040493827	1.2	0	5.4	6	-0.204	-0.003333333	0.698835275	5.490848586	0.299500832	5.790349417	0.571428571	0.3	5.7	0.570714286	0.6	5.7	0.141428571	6.4	M	49	14	12	0	0	17	19	11	9	N	N	3	12	N
NT814	9.76744186	6.6	2.392026578	3.4	3.986710963	3	4.186046511	4.6	0.591836735	-0.75	1.395348837	1.2	5.182724252	5.2	0.857142857	-1.166666667	2.156862745	1.993355482	4.901960784	5.182724252	0.779178338	-1.049291939	8.186356073	2.895174709	3.494176373	4.392678868	0.573170732	1.297836938	5.191347754	0.841463415	2.075782537	5.041186161	0.746433881	8.4	M	111	19	21	10	20	36	53	23	20	Y	Y	14	11	N
NT815	4.4	8	3.8	2.2	0.199335548	0.2	5.780730897	5.8	0.954696466	-0.521244973	0	0	6	5.980066445	1	-0.578947368	0	0	6	5.980066445	1	-0.578947368	6.2	3	0.199667221	5.790349417	0.967795609	0	5.990016639	1	0	5.990016639	1	10.3	M	76	20	15	0	0	27	34	13	13	N	N	8	1	N
NT816	6.179401993	0	4.584717608	5.980066445	3.6	0.199335548	4.8	5.780730897	0.417419355	-0.046956522	5	0.2	4	5.8	0.190860215	0.127536232	4.2	3.8	4.6	4.8	0.320322581	-0.003333333	3.089700996	5.282392026	1.896838602	5.291181364	0.386076968	2.6	4.9	0.158494624	4	4.7	-0.294623656	5.6	M	87	13	13	0	0	30	42	10	17	N	N	8	4	N
NT817	10.56478405	5	2.591362126	4	3.787375415	1.4	4.584717608	5.6	0.641509434	-0.769230769	1.4	1.2	5.2	5	0.867484277	-1.006666667	2.2	1.6	5.2	5.2	0.791761006	-1.006666667	7.78702163	3.294509151	2.595673877	5.091514143	0.666666667	1.3	5.1	0.833055556	1.9	5.2	0.756004273	7.2	M	146	11	8	0	0	17	27	18	28	Y	Y	28	18	N
NT819	0	0.4	5.833333333	5.6	2	0.8	5.4	5.4	#NAME?	0.074285714	0.2	1	5.8	5.4	#NAME?	0.005714286	NaN	NaN	NaN	NaN	NaN	NaN	0.23255814	5.697674419	1.4	5.4	-5.02	0.6	5.6	-1.58	NaN	NaN	NaN	5.6	F	96	27	37	10	20	52	71	9	9	N	Y	13	24	N
NT820	0	0.2	6	5.8	0.199335548	0	5.780730897	5.980066445	#NAME?	0.036544851	0	0	6	6	NaN	0	NaN	NaN	NaN	NaN	NaN	NaN	0.1	5.9	0.099667774	5.880398671	0.003322259	0	6	1	NaN	NaN	NaN	6.2	F	104	7	0	0	0	33	34	13	9	N	N	10	0	N
NT821	6.6	3.588039867	3.4	4.584717608	0.598006644	0	5.3820598	6	0.909392933	-0.582958765	0.4	0.2	5.8	5.8	0.939393939	-0.705882353	NaN	NaN	NaN	NaN	NaN	NaN	5.091514143	3.993344426	0.299500832	5.690515807	0.941176471	0.3	5.8	0.941078431	NaN	NaN	NaN	8.6	M	89	24	21	5	5	50	59	20	22	Y	Y	36	31	N
NT825	5	NaN	4	NaN	1.2	3.047619048	5.4	4.19047619	0.76	-0.35	0.797342193	4.2	5.780730897	4.2	0.840531561	-0.445182724	NaN	NaN	NaN	NaN	NaN	NaN	5	4	2.146341463	4.780487805	0.570731707	2.495840266	4.991680532	0.500831947	NaN	NaN	NaN	5.6	F	45	18	12	5	0	41	42	NaN	13	N	N	0	0	N
NT832	6.6	0.8	5	5.6	1.2	0.598006644	5.4	5.581395348	0.818181818	-0.08	0.996677741	1.196013289	5.581395348	5.581395348	0.848988221	-0.11627907	NaN	NaN	NaN	NaN	NaN	NaN	3.7	5.3	0.898502496	5.490848586	0.757161488	1.096345515	5.581395348	0.703690401	NaN	NaN	NaN	6.4	M	187	21	7	20	0	40	42	9	17	N	Y	6	12	N
NT833	0.8	NaN	5.4	NaN	2.2	0.797342193	5	5.581395348	-1.75	0.074074074	0.6	0.6	5.6	5.6	0.25	-0.037037037	NaN	NaN	NaN	NaN	NaN	NaN	0.8	5.4	1.49750416	5.291181364	-0.8718802	0.6	5.6	0.25	NaN	NaN	NaN	5.9	F	138	22	5	20	0	33	48	14	14	N	N	0	9	N
NT834	9.6	4.4	2.2	4	7.774086378	10.8	3.189368771	2.6	0.190199336	-0.449713078	7.2	9.368770763	3	2.790697674	0.25	-0.363636364	NaN	NaN	NaN	NaN	NaN	NaN	7	3.1	9.28452579	2.895174709	-0.326360827	8.286189684	2.895174709	-0.183741383	NaN	NaN	NaN	7.8	M	179	21	19	5	0	57	68	9	16	Y	Y	38	38	N
NT836	3.189368771	2.19269103	4.38538206	4.983388704	1.2	2.6	5.2	5	0.62375	-0.185757576	0.4	0.4	5.6	5.6	0.874583333	-0.276969697	NaN	NaN	NaN	NaN	NaN	NaN	2.6910299	4.684385382	1.9	5.1	0.293950617	0.4	5.6	0.851358025	NaN	NaN	NaN	10.6	M	246	15	16	20	20	40	52	29	29	Y	Y	31	41	N
NT823	5.2	4.584717608	4	4.186046511	NaN	NaN	NaN	NaN	NaN	NaN	0	0	5.999999999	6	1	-0.5	NaN	NaN	NaN	NaN	NaN	NaN	4.891846922	4.093178036	NaN	NaN	NaN	0	6	1	NaN	NaN	NaN	9.7	M	111	18	12	20	0	28	45	12	16	Y	Y	40	17	N
[truncated: 32 more columns]
